# Supplementary material for: First-Line Pharmacotherapies and Survival among Patients Diagnosed with Non-Resectable NSCLC: A Real-Life Setting Study with Gender Prospective
Source: MDPI journal article supplement (doi:10.3390/cancers13236129), 2021-12-05
Supplement: s1 [file s1]

## Supplementary Materials

**Figure S1.** Times series analysis: percentage of untreated patients and of those receiving standard chemotherapy during the study period per calendar quarters. Panel (A1) Non-squamous NSCLC, Male; Panel (A2) Non-squamous NSCLC, Female; Panel (B1) Squamous NSCLC, Male; Panel (B2) Squamous NSCLC, Female

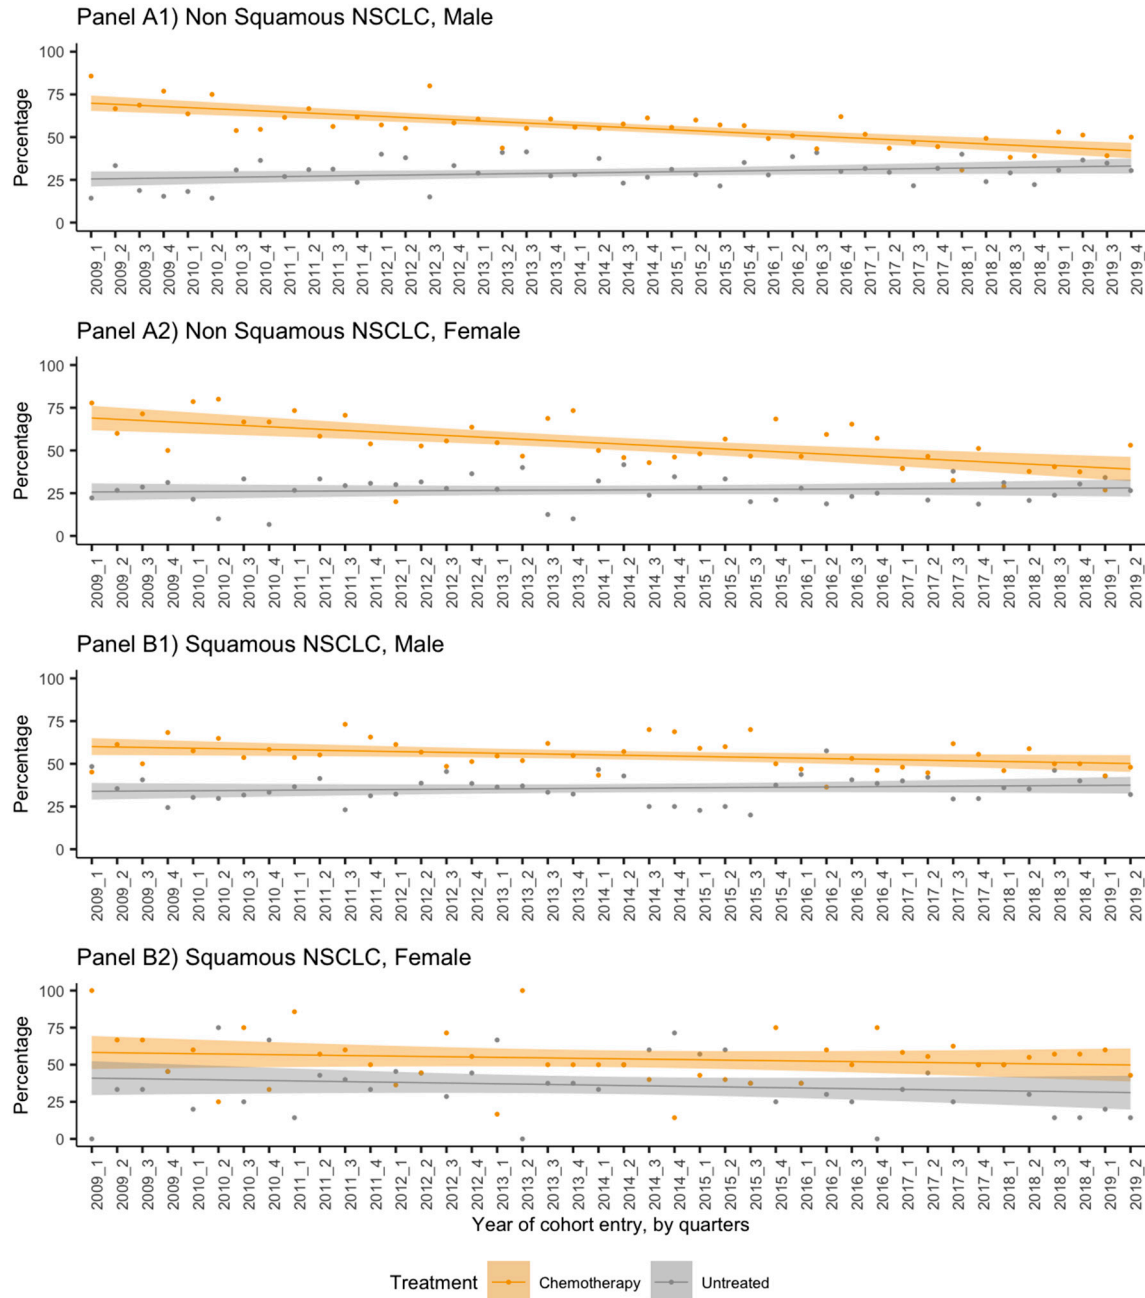

|         | Non squamous NSCLC |             |              |              | Squamous NSCLC |             |               |               |
|---------|--------------------|-------------|--------------|--------------|----------------|-------------|---------------|---------------|
|         | Male               |             | Female       |              | Male           |             | Female        |               |
|         | Chemotherapy       | Untreated   | Chemotherapy | Untreated    | Chemotherapy   | Untreated   | Chemotherapy  | Untreated     |
| Trend   | tau = -0.546       | tau = 0.136 | tau = -0.495 | tau = 0.0269 | tau = -0.224   | tau = 0.119 | tau = -0.0414 | tau = -0.0962 |
| P value | 5.4319e-07*        | 0.21655     | 5.6485e-06*  | 0.81346      | 0.040784*      | 0.28062     | 0.7178        | 0.3917        |

\*Statistically significant

**Table S1.** Target- and immuno-therapies approved for the treatment of advanced/metastatic stage NSCLC

| Drugs                 | Target       | Approval date (EMA)                                          |
|-----------------------|--------------|--------------------------------------------------------------|
| <b>Target therapy</b> |              |                                                              |
| Erlotinib             | EGFR         | 3 November 2005, second-line<br>14 November 2011, first-line |
| Gefitinib             | EGFR         | 24 June 2009                                                 |
| Afatinib              | EGFR         | 25 September 2013                                            |
| Osimertinib           | EGFR         | 02 February 2016                                             |
| Dacomitinib           | EGFR         | 25 June 2019                                                 |
| Crizotinib            | ALK          | 23 October 2012                                              |
| Ceritinib             | ALK          | 06 May 2015                                                  |
| Alectinib             | ALK          | 16 February 2017                                             |
| Brigatinib            | ALK          | 22 November 2018                                             |
| Lorlatinib            | ALK          | 17 June 2019                                                 |
| Dabrafenib            | BRAF         | 29 March 2017                                                |
| Trametinib            | BRAF         | 27 March 2017                                                |
| Bevacizumab           | VEGF         | 21 August 2007                                               |
| Nintedanib            | VEGFR, PDGFR | 08 January 2015                                              |
| Ramucirumab           | VEGF         | 25 January 2016                                              |
| <b>Immunotherapy</b>  |              |                                                              |
| Nivolumab             | PD-1         |                                                              |
| Pembrolizumab         | PD-1         | 17 July 2015                                                 |
| Atezolizumab          | PD-L1        | 29 September 2017                                            |
| Durvalumab            | PD-L1        | 21 September 2018                                            |
| Ipilimumab            | Anti-CTLA    | 17 September 2020                                            |

**Table S2.** Characteristics of patients on the basis of first-line received

|                                        | Non squamous            |                         |                         |                         |                        |                       | Squamous                |                         |                         |                         |                        |                       |
|----------------------------------------|-------------------------|-------------------------|-------------------------|-------------------------|------------------------|-----------------------|-------------------------|-------------------------|-------------------------|-------------------------|------------------------|-----------------------|
|                                        | CT                      | TT                      | IT                      | uMAB                    | RT                     | NT                    | CT                      | TT                      | IT                      | uMAB                    | RT                     | NT                    |
| n                                      | 1447                    | 270                     | 85                      | 33                      | 149                    | 809                   | 845                     | 5                       | 26                      | 13                      | 104                    | 566                   |
| Female (%)                             | 526 (36.4)              | 158 (58.5)              | 33 (38.8)               | 10 (30.3)               | 44 (29.5)              | 286 (35.4)            | 151 (17.9)              | 3 (60.0)                | 7 (26.9)                | 1 (7.7)                 | 20 (19.2)              | 107 (18.9)            |
| YearCohortEntryDate (%)                |                         |                         |                         |                         |                        |                       |                         |                         |                         |                         |                        |                       |
| 2009                                   | 74 (5.1)                | 1 (0.4)                 | 0 (0.0)                 | 0 (0.0)                 | 7 (4.7)                | 26 (3.2)              | 91 (10.8)               | 0 (0.0)                 | 0 (0.0)                 | 0 (0.0)                 | 10 (9.6)               | 57 (10.1)             |
| 2010                                   | 89 (6.2)                | 1 (0.4)                 | 0 (0.0)                 | 3 (9.1)                 | 12 (8.1)               | 28 (3.5)              | 95 (11.2)               | 2 (40.0)                | 0 (0.0)                 | 1 (7.7)                 | 13 (12.5)              | 55 (9.7)              |
| 2011                                   | 120 (8.3)               | 8 (3.0)                 | 0 (0.0)                 | 1 (3.0)                 | 7 (4.7)                | 55 (6.8)              | 94 (11.1)               | 0 (0.0)                 | 0 (0.0)                 | 1 (7.7)                 | 7 (6.7)                | 51 (9.0)              |
| 2012                                   | 95 (6.6)                | 13 (4.8)                | 0 (0.0)                 | 0 (0.0)                 | 4 (2.7)                | 54 (6.7)              | 98 (11.6)               | 0 (0.0)                 | 0 (0.0)                 | 1 (7.7)                 | 12 (11.5)              | 72 (12.7)             |
| 2013                                   | 128 (8.8)               | 18 (6.7)                | 0 (0.0)                 | 3 (9.1)                 | 8 (5.4)                | 65 (8.0)              | 68 (8.0)                | 1 (20.0)                | 0 (0.0)                 | 0 (0.0)                 | 12 (11.5)              | 45 (8.0)              |
| 2014                                   | 137 (9.5)               | 28 (10.4)               | 0 (0.0)                 | 2 (6.1)                 | 11 (7.4)               | 79 (9.8)              | 63 (7.5)                | 0 (0.0)                 | 0 (0.0)                 | 0 (0.0)                 | 7 (6.7)                | 48 (8.5)              |
| 2015                                   | 150 (10.4)              | 19 (7.0)                | 0 (0.0)                 | 3 (9.1)                 | 17 (11.4)              | 76 (9.4)              | 58 (6.9)                | 1 (20.0)                | 0 (0.0)                 | 1 (7.7)                 | 11 (10.6)              | 31 (5.5)              |
| 2016                                   | 181 (12.5)              | 32 (11.9)               | 0 (0.0)                 | 5 (15.2)                | 20 (13.4)              | 103 (12.7)            | 70 (8.3)                | 1 (20.0)                | 0 (0.0)                 | 3 (23.1)                | 12 (11.5)              | 63 (11.1)             |
| 2017                                   | 189 (13.1)              | 61 (22.6)               | 17 (20.0)               | 8 (24.2)                | 24 (16.1)              | 121 (15.0)            | 86 (10.2)               | 0 (0.0)                 | 5 (19.2)                | 2 (15.4)                | 10 (9.6)               | 58 (10.2)             |
| 2018                                   | 168 (11.6)              | 66 (24.4)               | 45 (52.9)               | 6 (18.2)                | 33 (22.1)              | 123 (15.2)            | 92 (10.9)               | 0 (0.0)                 | 12 (46.2)               | 2 (15.4)                | 8 (7.7)                | 64 (11.3)             |
| 2019                                   | 116 (8.0)               | 23 (8.5)                | 23 (27.1)               | 2 (6.1)                 | 6 (4.0)                | 79 (9.8)              | 30 (3.6)                | 0 (0.0)                 | 9 (34.6)                | 2 (15.4)                | 2 (1.9)                | 22 (3.9)              |
| AgeAtCohortEntryDate (mean (SD))       | 66.38 (9.83)            | 68.51 (10.94)           | 66.89 (10.31)           | 67.94 (8.94)            | 72.93 (9.14)           | 72.82 (10.42)         | 69.12 (8.76)            | 70.00 (5.52)            | 71.04 (8.77)            | 68.77 (8.86)            | 75.72 (7.68)           | 74.64 (8.93)          |
| AgeBandAtCohortEntryDate (%)           |                         |                         |                         |                         |                        |                       |                         |                         |                         |                         |                        |                       |
| 18-54                                  | 183 (12.6)              | 32 (11.9)               | 12 (14.1)               | 2 (6.1)                 | 8 (5.4)                | 43 (5.3)              | 57 (6.7)                | 0 (0.0)                 | 0 (0.0)                 | 1 (7.7)                 | 1 (1.0)                | 25 (4.4)              |
| 55-69                                  | 676 (46.7)              | 101 (37.4)              | 35 (41.2)               | 15 (45.5)               | 38 (25.5)              | 230 (28.4)            | 344 (40.7)              | 3 (60.0)                | 11 (42.3)               | 5 (38.5)                | 20 (19.2)              | 112 (19.8)            |
| 70-84                                  | 573 (39.6)              | 127 (47.0)              | 36 (42.4)               | 16 (48.5)               | 92 (61.7)              | 446 (55.1)            | 434 (51.4)              | 2 (40.0)                | 12 (46.2)               | 7 (53.8)                | 75 (72.1)              | 365 (64.5)            |
| 85+                                    | 15 (1.0)                | 10 (3.7)                | 2 (2.4)                 | 0 (0.0)                 | 11 (7.4)               | 90 (11.1)             | 10 (1.2)                | 0 (0.0)                 | 3 (11.5)                | 0 (0.0)                 | 8 (7.7)                | 64 (11.3)             |
| LengthObservationPeriod (median [IQR]) | 322.00 [154.00, 615.50] | 538.00 [255.25, 793.50] | 438.00 [157.00, 575.00] | 374.00 [147.00, 635.00] | 154.00 [58.00, 609.00] | 62.00 [26.00, 294.00] | 301.00 [157.00, 496.00] | 199.00 [105.00, 645.00] | 344.50 [115.25, 527.50] | 232.00 [171.00, 453.00] | 178.50 [69.00, 694.25] | 77.50 [32.00, 275.50] |
| TC Chest = Yes (%)                     | 1095 (75.7)             | 191 (70.7)              | 62 (72.9)               | 16 (48.5)               | 114 (76.5)             | 547 (67.6)            | 657 (77.8)              | 4 (80.0)                | 18 (69.2)               | 8 (61.5)                | 83 (79.8)              | 418 (73.9)            |
| RX Chest = Yes (%)                     | 783 (54.1)              | 119 (44.1)              | 32 (37.6)               | 16 (48.5)               | 66 (44.3)              | 368 (45.5)            | 501 (59.3)              | 3 (60.0)                | 15 (57.7)               | 6 (46.2)                | 43 (41.3)              | 312 (55.1)            |

CT: Standard chemotherapy; TT: Target therapies; IT: Immunotherapy; uMAB: Unspecified monoclonal antibodies; RT: Radiotherapy; NT: Untreated

**Table S3.** Characteristics of treated patients by sex

|                                        | Non squamous            |                         | Squamous                |                         |
|----------------------------------------|-------------------------|-------------------------|-------------------------|-------------------------|
|                                        | Male                    | Female                  | Male                    | Female                  |
| n                                      | 1213                    | 771                     | 811                     | 182                     |
| YearCohortEntryDate (%)                |                         |                         |                         |                         |
| 2009                                   | 48 (4.0)                | 34 (4.4)                | 86 (10.6)               | 15 (8.2)                |
| 2010                                   | 65 (5.4)                | 40 (5.2)                | 101 (12.5)              | 10 (5.5)                |
| 2011                                   | 96 (7.9)                | 40 (5.2)                | 85 (10.5)               | 17 (9.3)                |
| 2012                                   | 72 (5.9)                | 40 (5.2)                | 90 (11.1)               | 21 (11.5)               |
| 2013                                   | 91 (7.5)                | 66 (8.6)                | 66 (8.1)                | 15 (8.2)                |
| 2014                                   | 112 (9.2)               | 66 (8.6)                | 59 (7.3)                | 11 (6.0)                |
| 2015                                   | 124 (10.2)              | 65 (8.4)                | 58 (7.2)                | 13 (7.1)                |
| 2016                                   | 140 (11.5)              | 98 (12.7)               | 67 (8.3)                | 19 (10.4)               |
| 2017                                   | 184 (15.2)              | 115 (14.9)              | 80 (9.9)                | 23 (12.6)               |
| 2018                                   | 174 (14.3)              | 144 (18.7)              | 86 (10.6)               | 28 (15.4)               |
| 2019                                   | 107 (8.8)               | 63 (8.2)                | 33 (4.1)                | 10 (5.5)                |
| AgeAtCohortEntryDate (mean (SD))       | 68.07 (9.36)            | 65.85 (11.03)           | 70.00 (8.80)            | 69.26 (9.17)            |
| AgeBandAtCohortEntryDate (%)           |                         |                         |                         |                         |
| 18-54                                  | 114 (9.4)               | 123 (16.0)              | 47 (5.8)                | 12 (6.6)                |
| 55-69                                  | 532 (43.9)              | 333 (43.2)              | 305 (37.6)              | 78 (42.9)               |
| 70-84                                  | 542 (44.7)              | 302 (39.2)              | 440 (54.3)              | 90 (49.5)               |
| 85+                                    | 25 (2.1)                | 13 (1.7)                | 19 (2.3)                | 2 (1.1)                 |
| LengthObservationPeriod (median [IQR]) | 298.00 [138.00, 606.00] | 399.00 [189.50, 729.50] | 307.00 [147.00, 533.00] | 244.50 [131.50, 433.50] |
